# Supplementary material for: Dietary Patterns of Patients with Prediabetes and Type 2 Diabetes
Source: MDPI journal article supplement (doi:10.3390/metabo13040532), 2023-04-07
Supplement: s1 [file s1]

**Table S2.** Food frequency of patients in the two groups

| <b>Foods and Amounts</b>                                                           | <b>Prediabetic</b>     | <b>T2DM</b>            | <b>p value</b> |
|------------------------------------------------------------------------------------|------------------------|------------------------|----------------|
| <i>Meat and fish (medium serving)</i>                                              |                        |                        |                |
| Beef: roast, steak, mince, stew or casserole                                       | 2.1 ± 1.0              | 2.1 ± 1.1              | 0.791          |
| Beefburgers                                                                        | 1.2 ± 0.4 <sup>a</sup> | 1.1 ± 0.3 <sup>b</sup> | <b>0.002</b>   |
| Pork: roast, chops, stew or slices                                                 | 2.6 ± 1.1              | 2.6 ± 1.2              | 0.978          |
| Lamb: roast, chops or stew                                                         | 1.2 ± 0.6              | 1.2 ± 0.5              | 0.718          |
| Chicken or other poultry eg. turkey                                                | 4.0 ± 1.0              | 4.1 ± 1.0              | 0.245          |
| Bacon                                                                              | 1.3 ± 0.7              | 1.3 ± 0.7              | 0.520          |
| Ham                                                                                | 1.9 ± 1.1              | 1.8 ± 1.0              | 0.133          |
| Corned beef, Spam, luncheon meats                                                  | 1.0 ± 0.9              | 1.0 ± 0.9              | 0.668          |
| Sausages                                                                           | 2.0 ± 1.1 <sup>a</sup> | 1.7 ± 1.0 <sup>b</sup> | <b>0.000</b>   |
| Savoury pies, eg. meat pie, pork pie, pasties, steak & kidney pie, sausage rolls   | 1.3 ± 0.7 <sup>a</sup> | 1.1 ± 0.3 <sup>b</sup> | <b>0.002</b>   |
| Liver, liver pâté, liver sausage                                                   | 1.3 ± 0.7              | 1.2 ± 0.3              | 0.021          |
| Fried fish in batter, as in fish and chips                                         | 1.4 ± 0.7 <sup>a</sup> | 1.5 ± 0.8 <sup>b</sup> | <b>0.031</b>   |
| Fish fingers, fish cakes                                                           | 1.1 ± 0.4              | 1.1 ± 0.4              | 0.600          |
| Other white fish, fresh or frozen, eg. cod, haddock, plaice, sole, halibut         | 2.2 ± 0.9              | 2.2 ± 1.0              | 0.935          |
| Oily fish, fresh or canned, eg. mackerel, kippers, tuna, salmon, sardines, herring | 1.0 ± 0.6              | 1.0 ± 0.1              | 0.318          |
| Shellfish, eg. crab, prawns, mussels                                               | 1.1 ± 0.4              | 1.1 ± 0.3              | 0.140          |
| Fish roe, taramasalata                                                             | 1.3 ± 0.6              | 1.3 ± 0.6              | 0.929          |
| <i>Bread and savoury biscuits (one slice or biscuit)</i>                           |                        |                        |                |
| White bread and rolls                                                              | 4.7 ± 2.8              | 4.4 ± 3.0              | 0.300          |
| Brown bread and rolls                                                              | 3.4 ± 2.6              | 3.4 ± 2.8              | 0.699          |
| Wholemeal bread and rolls                                                          | 3.5 ± 2.6              | 3.2 ± 2.7              | 0.116          |
| Cream crackers, cheese biscuits                                                    | 1.1 ± 0.5              | 1.1 ± 0.4              | 0.083          |
| Crispbread                                                                         | 1.2 ± 0.6              | 1.1 ± 0.6              | 0.361          |
| <i>Cereals (one bowl)</i>                                                          |                        |                        |                |
| Porridge, Readybrek                                                                | 1.3 ± 0.8              | 1.2 ± 0.7              | 0.081          |
| Breakfast cereal such as cornflakes, muesli etc.                                   | 1.6 ± 1.1 <sup>a</sup> | 1.4 ± 0.9 <sup>b</sup> | <b>0.020</b>   |
| <i>Potatoes, rice and pasta (medium serving)</i>                                   |                        |                        |                |
| Boiled, mashed, instant or jacket potatoes                                         | 3.4 ± 1.1              | 3.3 ± 1.0              | 0.382          |
| Chips                                                                              | 2.2 ± 1.0 <sup>a</sup> | 2.0 ± 1.0 <sup>b</sup> | <b>0.009</b>   |
| Roast potatoes                                                                     | 2.0 ± 1.0              | 1.8 ± 1.0              | 0.076          |
| Potato salad                                                                       | 1.0 ± 0.2              | 1.0 ± 0.1              | 0.318          |
| White rice                                                                         | 2.6 ± 1.0              | 2.6 ± 0.9              | 0.590          |
| Brown rice                                                                         | 1.2 ± 0.6              | 1.1 ± 0.5              | 0.217          |
| White or green pasta, eg. Spaghetti, macaroni, noodles                             | 2.4 ± 0.9              | 2.4 ± 0.9              | 0.483          |
| Wholemeal pasta                                                                    | 1.2 ± 0.6              | 1.1 ± 0.5              | 0.325          |
| Lasagne, moussaka                                                                  | 1.3 ± 0.5 <sup>a</sup> | 1.1 ± 0.4 <sup>b</sup> | <b>0.000</b>   |
| Pizza                                                                              | 1.6 ± 0.7 <sup>a</sup> | 1.4 ± 0.6 <sup>b</sup> | <b>0.000</b>   |
| Single or sour cream (tablespoon)                                                  | 1.9 ± 1.3              | 1.9 ± 1.2              | 0.690          |
| Double or clotted cream (tablespoon)                                               | 2.3 ± 1.3              | 2.2 ± 1.2              | 0.232          |
| Low fat yogurt, fromage frais (125g carton)                                        | 2.4 ± 1.6              | 2.3 ± 1.6              | 0.246          |
| Full fat or Greek yogurt (125g carton)                                             | 2.6 ± 1.6              | 2.6 ± 1.7              | 0.821          |
| Dairy desserts (125g carton)                                                       | 1.1 ± 0.5              | 1.1 ± 0.4              | 0.348          |

|                                                                         |                        |                        |              |
|-------------------------------------------------------------------------|------------------------|------------------------|--------------|
| Cheese, eg. Cheddar, Brie, Edam (medium serving)                        | 1.5 ± 1.0              | 1.5 ± 0.9              | 0.713        |
| Cottage cheese, low fat soft cheese (medium serving)                    | 3.2 ± 1.1              | 3.2 ± 1.2              | 0.713        |
| Eggs as boiled, fried, scrambled, etc. (one)                            | 3.7 ± 1.1              | 3.8 ± 1.0              | 0.641        |
| Quiche (medium serving)                                                 | 1.0 ± 0.2              | 1.1 ± 0.4              | 0.130        |
| Low calorie, low fat salad cream (tablespoon)                           | 1.1 ± 0.3              | 1.1 ± 0.3              | 0.404        |
| Salad cream, mayonnaise (tablespoon)                                    | 1.2 ± 0.5 <sup>a</sup> | 1.1 ± 0.4 <sup>b</sup> | <b>0.026</b> |
| French dressing (tablespoon)                                            | 1.1 ± 0.5              | 1.2 ± 0.7              | 0.763        |
| Other salad dressing (tablespoon)                                       | 3.6 ± 1.9              | 3.4 ± 2.0              | 0.085        |
| <i>The following on bread or vegetables</i>                             |                        |                        |              |
| Butter (teaspoon)                                                       | 2.2 ± 1.3              | 2.3 ± 1.3              | 0.569        |
| Block or hard margarine (teaspoon)                                      | 1.3 ± 0.8              | 1.4 ± 0.9              | 0.824        |
| Polyunsaturated margarine (teaspoon)                                    | 1.2 ± 0.6              | 1.2 ± 0.6              | 0.851        |
| Soft margarines, including olive oil based and dairy spreads (teaspoon) | 1.3 ± 0.8              | 1.2 ± 0.7              | 0.051        |
| Low fat spreads (less than 60% fat) (teaspoon)                          | 1.1 ± 0.5              | 1.1 ± 0.3              | 0.127        |
| Very low fat spread (less than 30% fat) (teaspoon)                      | 1.1 ± 0.3              | 1.0 ± 0.2              | 0.258        |
| <i>Sweets and snacks (medium serving)</i>                               |                        |                        |              |
| Sweet biscuits, chocolate, eg. digestive (one)                          | 1.6 ± 1.0              | 1.5 ± 0.9              | 0.161        |
| Sweet biscuits, plain, eg. Nice, ginger (one)                           | 1.9 ± 1.2              | 1.8 ± 1.1              | 0.492        |
| Cakes eg. fruit, sponge, home baked                                     | 1.3 ± 0.6 <sup>a</sup> | 1.2 ± 0.4 <sup>b</sup> | <b>0.018</b> |
| Cakes eg. fruit, sponge, ready made                                     | 1.2 ± 0.5              | 1.1 ± 0.4              | 0.232        |
| Buns, pastries eg. scones, flapjacks, home baked                        | 1.1 ± 0.7              | 1.1 ± 0.4              | 0.114        |
| Buns, pastries eg. croissants, doughnuts, ready made                    | 1.1 ± 0.3              | 1.1 ± 0.5              | 0.076        |
| Fruit pies, tarts, crumbles, home baked                                 | 1.7 ± 0.7 <sup>a</sup> | 1.6 ± 0.7 <sup>b</sup> | <b>0.036</b> |
| Fruit pies, tarts, crumbles, ready made                                 | 1.2 ± 0.5              | 1.1 ± 0.4              | 0.155        |
| Sponge puddings, home baked                                             | 1.3 ± 0.7              | 1.2 ± 0.5              | 0.178        |
| Sponge puddings, ready made                                             | 1.1 ± 0.3              | 1.0 ± 0.2              | 0.129        |
| Milk puddings, eg. rice, custard, trifle                                | 1.6 ± 0.8 <sup>a</sup> | 1.4 ± 0.8 <sup>b</sup> | <b>0.016</b> |
| Ice cream, choc ices                                                    | 2.3 ± 1.1              | 2.1 ± 1.1              | 0.172        |
| Chocolates, single or squares                                           | 2.2 ± 1.2              | 2.2 ± 1.3              | 0.622        |
| Chocolate snack bars                                                    | 1.3 ± 0.7 <sup>a</sup> | 1.1 ± 0.5 <sup>b</sup> | <b>0.015</b> |
| Sweets, toffees, mints                                                  | 1.6 ± 1.1              | 1.5 ± 1.0              | 0.178        |
| Sugar added to tea, coffee, cereal (teaspoon)                           | 2.9 ± 2.2 <sup>a</sup> | 2.1 ± 1.9 <sup>b</sup> | <b>0.000</b> |
| Crisps or other packet snacks                                           | 1.5 ± 0.9 <sup>a</sup> | 1.3 ± 0.7 <sup>b</sup> | <b>0.001</b> |
| Peanuts or other nuts                                                   | 2.2 ± 1.2              | 2.1 ± 1.2              | 0.140        |
| <i>Soups, sauces, and spreads</i>                                       |                        |                        |              |
| Vegetable soups (bowl)                                                  | 4.1 ± 1.2              | 4.1 ± 1.1              | 0.937        |
| Meat soups (bowl)                                                       | 3.8 ± 1.1              | 3.9 ± 1.0              | 0.087        |
| Sauces, eg. white sauce, cheese sauce, gravy (tablespoon)               | 1.3 ± 0.7 <sup>a</sup> | 1.2 ± 0.6 <sup>b</sup> | <b>0.011</b> |
| Tomato ketchup (tablespoon)                                             | 2.7 ± 1.7 <sup>a</sup> | 2.2 ± 1.4 <sup>b</sup> | <b>0.000</b> |
| Pickles, chutney (tablespoon)                                           | 2.6 ± 1.3              | 2.5 ± 1.3              | 0.799        |
| Marmite, Bovril (teaspoon)                                              | 1.1 ± 0.3              | 1.0 ± 0.3              | 0.377        |
| Jam, marmalade, honey (teaspoon)                                        | 2.0 ± 1.3              | 2.0 ± 1.3              | 0.557        |
| Peanut butter (teaspoon)                                                | 1.1 ± 0.5              | 1.1 ± 0.5              | 0.904        |
| <i>Drinks</i>                                                           |                        |                        |              |
| Tea (cup)                                                               | 4.3 ± 1.9              | 4.2 ± 2.0              | 0.545        |
| Coffee, instant or ground (cup)                                         | 4.8 ± 2.1              | 4.9 ± 2.1              | 0.837        |
| Coffee, decaffeinated (cup)                                             | 1.2 ± 0.9              | 1.1 ± 0.7              | 0.117        |

|                                                            |                        |                        |              |
|------------------------------------------------------------|------------------------|------------------------|--------------|
| Coffee whitener, eg. Coffee-mate (teaspoon)                | 1.6 ± 1.5              | 1.4 ± 1.3              | 0.055        |
| Cocoa, hot chocolate (cup)                                 | 1.2 ± 0.7              | 1.1 ± 0.7              | 0.448        |
| Horlicks, Ovaltine (cup)                                   | 1.0 ± 0.3              | 1.0 ± 0.3              | 0.572        |
| Wine (glass)                                               | 1.5 ± 1.0 <sup>a</sup> | 1.7 ± 1.2 <sup>b</sup> | <b>0.017</b> |
| Beer, lager or cider (half pint)                           | 1.3 ± 0.8              | 1.3 ± 0.7              | 0.297        |
| Port, sherry, vermouth, liqueurs (glass)                   | 1.0 ± 0.3              | 1.0 ± 0.3              | 0.988        |
| Spirits, eg. gin, brandy, whisky, vodka (single)           | 1.4 ± 0.9              | 1.3 ± 0.8              | 0.385        |
| Low calorie or diet fizzy soft drinks (glass)              | 1.2 ± 0.5              | 1.2 ± 0.6              | 0.597        |
| Fizzy soft drinks, eg. Coca cola, lemonade (glass)         | 1.5 ± 0.9              | 1.3 ± 0.8              | 0.053        |
| Pure fruit juice (100%) eg. orange, apple juice (glass)    | 1.5 ± 1.1              | 1.4 ± 0.9              | 0.073        |
| Fruit squash or cordial (glass)                            | 1.1 ± 0.6              | 1.1 ± 0.5              | 0.145        |
| <i>Fruit</i>                                               |                        |                        |              |
| Apples (1 fruit)                                           | 4.6 ± 1.5 <sup>a</sup> | 4.9 ± 1.4 <sup>b</sup> | <b>0.002</b> |
| Pears (1 fruit)                                            | 2.3 ± 1.2              | 2.3 ± 1.3              | 0.483        |
| Oranges, satsumas, mandarins (1 fruit)                     | 3.0 ± 1.2              | 3.1 ± 1.4              | 0.214        |
| Grapefruit (half)                                          | 2.5 ± 1.2              | 2.7 ± 1.4              | 0.052        |
| Bananas (1 fruit)                                          | 2.5 ± 1.2              | 2.6 ± 1.4              | 0.510        |
| Grapes (medium serving)                                    | 2.3 ± 1.1 <sup>a</sup> | 2.6 ± 1.4 <sup>b</sup> | <b>0.002</b> |
| Melon (1 slice)                                            | 2.6 ± 1.4              | 2.7 ± 1.4              | 0.371        |
| Peaches, plums, apricots (1 fruit)                         | 3.3 ± 1.3 <sup>a</sup> | 3.1 ± 1.3 <sup>b</sup> | <b>0.020</b> |
| Strawberries, raspberries, kiwi fruit (medium serving)     | 3.1 ± 1.3              | 3.1 ± 1.4              | 0.754        |
| Tinned fruit (medium serving)                              | 1.7 ± 0.9 <sup>a</sup> | 1.5 ± 0.9 <sup>b</sup> | <b>0.031</b> |
| Dried fruit, eg. raisins, prunes (medium serving)          | 1.4 ± 0.9              | 1.3 ± 0.7              | 0.277        |
| <i>Vegetables fresh, frozen or tinned (medium serving)</i> |                        |                        |              |
| Carrots                                                    | 5.0 ± 1.3              | 5.2 ± 1.1              | 0.125        |
| Spinach                                                    | 2.0 ± 1.3              | 1.9 ± 1.1              | 0.334        |
| Broccoli, spring greens, kale                              | 1.7 ± 1.0              | 1.7 ± 1.0              | 0.511        |
| Brussels sprouts                                           | 2.5 ± 0.9              | 2.5 ± 1.0              | 0.921        |
| Cabbage                                                    | 2.9 ± 0.9              | 2.8 ± 1.1              | 0.141        |
| Peas                                                       | 2.2 ± 0.9              | 2.1 ± 0.9              | 0.711        |
| Green beans, broad beans, runner beans                     | 2.4 ± 0.8              | 2.3 ± 1.0              | 0.647        |
| Marrow, courgettes                                         | 2.1 ± 1.0              | 2.1 ± 0.9              | 0.652        |
| Cauliflower                                                | 1.9 ± 0.9              | 2.0 ± 1.0              | 0.374        |
| Parsnips, turnips, swedes                                  | 2.4 ± 1.3 <sup>a</sup> | 3.1 ± 1.7 <sup>b</sup> | <b>0.031</b> |
| Leeks                                                      | 1.5 ± 1.0 <sup>a</sup> | 1.3 ± 0.7 <sup>b</sup> | <b>0.002</b> |
| Onions                                                     | 4.9 ± 1.2 <sup>a</sup> | 5.1 ± 1.0 <sup>b</sup> | <b>0.003</b> |
| Garlic                                                     | 3.6 ± 1.4              | 3.7 ± 1.4              | 0.169        |
| Mushrooms                                                  | 2.6 ± 0.9              | 2.6 ± 1.0              | 0.973        |
| Sweet peppers                                              | 2.9 ± 1.2 <sup>a</sup> | 3.1 ± 1.2 <sup>b</sup> | <b>0.031</b> |
| Beansprouts                                                | 2.5 ± 0.9              | 2.5 ± 1.0              | 0.610        |
| Green salad, lettuce, cucumber, celery                     | 2.9 ± 1.3 <sup>a</sup> | 3.2 ± 1.5 <sup>b</sup> | <b>0.005</b> |
| Watercress                                                 | 1.3 ± 1.0              | 1.2 ± 0.7              | 0.104        |
| Tomatoes                                                   | 4.1 ± 1.4              | 4.3 ± 1.4              | 0.079        |
| Sweetcorn                                                  | 1.5 ± 1.0 <sup>a</sup> | 1.4 ± 0.7 <sup>b</sup> | <b>0.040</b> |
| Beetroot                                                   | 2.1 ± 0.8              | 2.1 ± 0.9              | 0.282        |
| Coleslaw                                                   | 2.8 ± 0.9              | 2.8 ± 1.1              | 0.654        |
| Avocado                                                    | 1.4 ± 0.9              | 1.3 ± 0.8              | 0.141        |
| Baked beans                                                | 1.8 ± 0.6 <sup>a</sup> | 1.7 ± 0.6 <sup>b</sup> | <b>0.011</b> |
| Dried lentils, beans, peas                                 | 1.7 ± 0.7              | 1.8 ± 0.9              | 0.070        |

|                                   |                        |                        |              |
|-----------------------------------|------------------------|------------------------|--------------|
| Tofu , soya meat, TVP, Vegeburger | 1.3 ± 0.5 <sup>a</sup> | 1.2 ± 0.4 <sup>b</sup> | <b>0.002</b> |
|-----------------------------------|------------------------|------------------------|--------------|

1 (never or less than once/month), 2 (1-3 per month), 3 (once a week), 4 (2-4 per week), 5 (5-6 per week), 6 (once a day), 7 (2-3 per day), 8 (4-5 per day), 9 (6+ per day). Variables are presented as mean ± SD.
