# Supplementary material for: Dietary Patterns of Patients with Prediabetes and Type 2 Diabetes
Source: MDPI journal article supplement (doi:10.3390/metabo13040532), 2023-04-07
Supplement: s1 [file s1]

**Table S5.** Correlation analyses between dietary intake and lipid profile

|                            | Prediabetic |          |             |          |             |          | T2DM       |          |             |          |             |          |
|----------------------------|-------------|----------|-------------|----------|-------------|----------|------------|----------|-------------|----------|-------------|----------|
|                            | TG (mg/dL)  |          | HDL (mg/dL) |          | LDL (mg/dL) |          | TG (mg/dL) |          | HDL (mg/dL) |          | LDL (mg/dL) |          |
|                            | <b>r</b>    | <b>p</b> | <b>r</b>    | <b>p</b> | <b>r</b>    | <b>p</b> | <b>r</b>   | <b>p</b> | <b>r</b>    | <b>p</b> | <b>r</b>    | <b>p</b> |
| Meat and meat products (g) | 0.028       | 0.650    | -0.051      | 0.409    | 0.086       | 0.037    | 0.027      | 0.513    | -0.063      | 0.130    | 0.052       | 0.205    |
| Eggs and egg dishes (g)    | 0.010       | 0.875    | -0.088      | 0.032    | 0.049       | 0.429    | 0.032      | 0.439    | -0.006      | 0.881    | 0.004       | 0.926    |
| Milk and milk products (g) | 0.069       | 0.262    | 0.104       | 0.092    | -0.029      | 0.645    | -0.138     | 0.025    | 0.048       | 0.248    | -0.052      | 0.205    |

TG, triglycerides; HDL, HDL cholesterol; LDL, LDL cholesterol.
