# Supplementary material for: Dietary Patterns of Patients with Prediabetes and Type 2 Diabetes
Source: MDPI journal article supplement (doi:10.3390/metabo13040532), 2023-04-07
Supplement: s1 [file s1]

**Table S4.** Correlation analyses between dietary intake and biomarkers of glycemic control

|                            | Prediabetic |          |           |          |             |          | T2DM        |          |           |          |             |          |
|----------------------------|-------------|----------|-----------|----------|-------------|----------|-------------|----------|-----------|----------|-------------|----------|
|                            | FPG (mg/dL) |          | HbA1c (%) |          | SI (μIU/mL) |          | FPG (mg/dL) |          | HbA1c (%) |          | SI (μIU/mL) |          |
|                            | <b>r</b>    | <b>p</b> | <b>r</b>  | <b>p</b> | <b>r</b>    | <b>p</b> | <b>r</b>    | <b>p</b> | <b>r</b>  | <b>p</b> | <b>r</b>    | <b>p</b> |
| Potatoes (g)               | 0.151       | 0.000    | 0.040     | 0.520    | 0.013       | 0.839    | 0.061       | 0.274    | 0.066     | 0.237    | 0.073       | 0.079    |
| Soups & sauces (g)         | 0.086       | 0.048    | 0.029     | 0.644    | 0.115       | 0.062    | 0.079       | 0.066    | 0.033     | 0.562    | 0.102       | 0.068    |
| Meat and meat products (g) | 0.099       | 0.111    | 0.119     | 0.042    | 0.034       | 0.591    | 0.002       | 0.964    | 0.043     | 0.300    | 0.001       | 0.975    |
| Milk and milk products (g) | 0.073       | 0.240    | 0.076     | 0.237    | 0.237       | 0.000    | 0.190       | 0.002    | 0.032     | 0.463    | 0.006       | 0.916    |
| Nuts and seeds (g)         | -0.034      | 0.588    | -0.016    | 0.039    | 0.115       | 0.062    | -0.026      | 0.536    | -0.031    | 0.465    | 0.062       | 0.267    |
| Fruit (g)                  | 0.105       | 0.089    | 0.097     | 0.118    | 0.068       | 0.287    | 0.184       | 0.003    | 0.057     | 0.310    | 0.023       | 0.579    |
| Fats and oils (g)          | -0.053      | 0.395    | -0.097    | 0.116    | -0.039      | 0.547    | -0.012      | 0.764    | -0.167    | 0.007    | -0.011      | 0.791    |

FPG, fasting plasma glucose; HbA1c, glycated hemoglobin; SI, serum insulin.
