# Supplementary material for: Dietary Patterns of Patients with Prediabetes and Type 2 Diabetes
Source: MDPI journal article supplement (doi:10.3390/metabo13040532), 2023-04-07
Supplement: s1 [file s1]

**Table S3.** Correlation analyses between dietary intake and anthropometric measurements

|                                 | Prediabetic |          |          |          |          |          | T2DM        |          |          |          |          |          |
|---------------------------------|-------------|----------|----------|----------|----------|----------|-------------|----------|----------|----------|----------|----------|
|                                 | Weight (kg) |          | WC (cm)  |          | BF (%)   |          | Weight (kg) |          | WC (cm)  |          | BF (%)   |          |
|                                 | <b>r</b>    | <b>p</b> | <b>r</b> | <b>p</b> | <b>r</b> | <b>p</b> | <b>r</b>    | <b>p</b> | <b>r</b> | <b>p</b> | <b>r</b> | <b>p</b> |
| Meat and meat products (g)      | 0.142       | 0.001    | 0.127    | 0.002    | 0.017    | 0.783    | 0.052       | 0.209    | 0.055    | 0.180    | 0.046    | 0.270    |
| Cereals and cereal products (g) | -0.006      | 0.922    | -0.018   | 0.775    | -0.127   | 0.003    | -0.037      | 0.372    | -0.063   | 0.128    | -0.147   | 0.018    |
| Fruit (g)                       | 0.102       | 0.099    | 0.038    | 0.535    | 0.053    | 0.393    | 0.134       | 0.030    | 0.057    | 0.171    | 0.043    | 0.306    |

WC, waist circumference; BF, body fat.
