# Supplementary material for: Dietary Patterns of Patients with Prediabetes and Type 2 Diabetes
Source: MDPI journal article supplement (doi:10.3390/metabo13040532), 2023-04-07
Supplement: s1 [file s1]

**Table S1.** Food grouping used in the dietary pattern assessment

| Food groups                | Food                                                                                                                                                                                                                                                                                                                                                                                                                                                                                                                    |
|----------------------------|-------------------------------------------------------------------------------------------------------------------------------------------------------------------------------------------------------------------------------------------------------------------------------------------------------------------------------------------------------------------------------------------------------------------------------------------------------------------------------------------------------------------------|
| Meat and fish              | beef: roast, steak, mince, stew or casserole, beefburgers, pork: roast, chops, stew or slices, lamb: roast, chops or stew, chicken or other poultry, bacon, ham, corned beef, spam, luncheon meats, sausages, savoury pies, liver, liver paté, liver sausage, fried fish in batter, as in fish and chips, fish fingers, fish cakes, other white fish, fresh or frozen, oily fish, fresh or canned, shellfish, fish roe, taramasalata                                                                                    |
| Bread and savoury biscuits | white bread and rolls, brown bread and rolls, wholemeal bread and rolls, cream crackers, cheese biscuits, crispbread                                                                                                                                                                                                                                                                                                                                                                                                    |
| Cereals                    | porridge, Readybrek, breakfast cereal such as cornflakes, muesli etc.                                                                                                                                                                                                                                                                                                                                                                                                                                                   |
| Potatoes, rice and pasta   | boiled, mashed, instant or jacket potatoes, chips, roast potatoes, potato salad, white rice, brown rice, white or green pasta, wholemeal pasta, lasagna, moussaka, pizza                                                                                                                                                                                                                                                                                                                                                |
| Diary products and fats    | single or sour cream, double or clotted cream, low fat yogurt, fromage frais, full fat or Greek yogurt, dairy desserts, cheese, cottage cheese, low fat soft cheese, eggs as boiled, fried, scrambled, quiche, low calorie, low fat salad cream, salad cream, mayonnaise, french dressing, other salad dressing, butter, block or hard margarine, polyunsaturated margarine, soft margarines, including olive oil based and dairy spreads, low fat spreads (less than 60% fat), very low fat spread (less than 30% fat) |
| Sweets and snacks          | sweet biscuits, chocolate, sweet biscuits, plain, cakes home baked, cakes ready-made, buns, pastries homemade, buns, pastries ready-made, fruit pies, tarts, crumbles, home baked, fruit pies, tarts, crumbles, ready-made, sponge puddings, home baked, sponge puddings, readymade, milk puddings, ice cream, choc ices, chocolates, single or squares, chocolate snack bars, sweets, toffees, mints, sugar added to tea, coffee, cereal, crisps or other packet snacks, peanuts or other nuts                         |
| Soups, sauces, and spreads | vegetable soups, meat soups, sauces, tomato ketchup, pickles, chutney, marmite, bovril, jam, marmalade, honey, peanut butter                                                                                                                                                                                                                                                                                                                                                                                            |
| Drinks                     | tea, coffee, instant or ground, coffee, decaffeinated, coffee whitener, cocoa, hot chocolate, horlicks, ovaltine, wine, beer, lager or cider, port, sherry, vermouth, liqueurs, spirits, low calorie or diet fizzy soft drinks, fizzy soft drinks, pure fruit juice (100%), fruit squash or cordial                                                                                                                                                                                                                     |
| Fruit                      | apples, pears, oranges, satsumas, mandarins, grapefruit, bananas, grapes, melon, peaches, plums, apricots, strawberries, raspberries, kiwi fruit, tinned fruit, dried fruit                                                                                                                                                                                                                                                                                                                                             |
| Vegetables                 | carrots, spinach, broccoli, spring greens, kale, brussels sprouts, cabbage, peas, green beans, broad beans, runner beans, marrow, courgettes, cauliflower, parsnips, turnips, swedes, leeks, onions, garlic, mushrooms, sweet peppers, beansprouts, green salad, lettuce, cucumber, celery, watercress, tomatoes, sweetcorn, beetroot, coleslaw, avocado, baked beans, dried lentils, beans, peas, tofu, soya meat, TVP, veggieburger                                                                                   |
